# Supplementary material for: “On water” synthesis of highly functionalized 4H-chromenes via carbon–carbon bond formation under microwave irradiation and their antibacterial properties
Source: Royal Society of Chemistry journal article supplement (doi:10.1039/c5ra01301a), 2015-01-01

## Electronic supporting information

### **“On water” Synthesis of Highly Functionalized 4*H*-chromenes via Carbon-Carbon Bond Formation under Microwave Irradiation and Their Antibacterial Properties.**

*L. Chandrasekhara Rao<sup>a</sup>, N. Satish Kumar<sup>a</sup>, V. Dileepkumar<sup>b</sup>, U. S. N. Murthy<sup>b</sup> and H. M. Meshram<sup>a,\*</sup>*

*<sup>a</sup>Medicinal chemistry and pharmacology division, <sup>b</sup>Biology division, CSIR-Indian Institute of Chemical Technology,*

*Hyderabad – 500 007, India, Tel.: +91-40-27191640, Fax: 91-40-27160512,*

*E-mail: [hmmeshram@yahoo.com](mailto:hmmeshram@yahoo.com)*

#### Contents

|                                                               |        |
|---------------------------------------------------------------|--------|
| General procedure -----                                       | S2     |
| Spectral data of all compounds -----                          | S3- S7 |
| <sup>1</sup> H NMR and <sup>13</sup> C of all compounds ----- | S8-S21 |

**General information:** All the chemicals were purchased from Sigma Aldrich and Alpha Aesar company and used without further purification as received. All  $^1\text{H}$  and  $^{13}\text{C}$  NMR spectra were recorded in  $\text{CDCl}_3$  on Avance 300 or Avance 500 spectrometers. Chemical shifts ( $\delta$ ) are reported in parts per million (ppm) relative to residual  $\text{CHCl}_3$  ( $^1\text{H}$ :  $\delta$  7.26 ppm,  $^{13}\text{C}$ :  $\delta$  77.00 ppm) as an internal reference. Coupling constants ( $J$ ) are reported in Hertz (Hz). Peak multiplicity is indicated as follows: s—singlet, d—doublet, t—triplet, q—quartet, m—multiplet and dd—doublet of doublet. Melting points were measured on a BUCHI melting point machine. IR spectra were recorded on Thermo Nicolet FT/IR-5700 spectrometer. Mass spectra were recorded using Waters mass spectrometer. High resolution mass spectrums (HRMS) were recorded using Applied Bio-Sciences HRMS spectrometer at national center for mass spectroscopy-IICT. S3

**General procedure:** In a microwave reaction vial 2*H*-chromene(1a)(1mmol) and 4-hydroxy coumarin(2a)(1mmol) in 2ml of water kept under microwave irradiation for 20 minutes at 105°C as mentioned in Table 1. After completion of the reaction (indicated by TLC), the free flowing solid was filtered and washed with water (20 mL) to afford the desired products as pale yellow solids. The product thus obtained was recrystallized from ethanol to get pure compounds as white or pale yellow crystals. The isolated compounds were well characterized by IR,  $^1\text{H}$  NMR,  $^{13}\text{C}$  NMR and HRMS.

**Ethyl 4-hydroxy-2'-methyl-2-oxo-2H,4'H-[3,4'-bichromene]-3'-carboxylate (3a):**

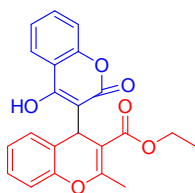

White solid; Mp 158-160° C; IR:  $\nu_{\max}$  3238, 2877, 1682, 1612, 1502, 1485, 1376, 1231, 1151, 1046, 880, 751  $\text{cm}^{-1}$ ;  $^1\text{H}$  NMR (300 MHz,  $\text{CDCl}_3$ ):  $\delta$  8.00 (d,  $J = 7.55$  Hz, 1H), 7.63 (s, 1H), 7.42-7.53 (m, 1H), 7.06-7.31 (m, 4H), 6.88-7.00 (2H, m), 5.54 (s, 1H), 4.00-4.19 (m, 2H), 2.45 (s, 3H), 1.20 (t,  $J = 7.18$  Hz, 3H),  $^{13}\text{C}$  NMR (75 MHz,  $\text{CDCl}_3$ ):  $\delta$  167.2, 161.3, 151.8, 149.7, 130.7, 127.4, 126.8, 123.2, 122.9, 122.6, 121.7, 115.9, 115.4, 114.6, 108.9, 100.7, 59.5, 30.4, 19.2, 13.4;  $m/z$  (ESI); 379  $[\text{M}+\text{H}]^+$ , 401  $[\text{M}+\text{Na}]^+$ .

**Tert-butyl 4-hydroxy-2'-methyl-2-oxo-2H,4'H-[3,4'-bichromene]-3'-carboxylate (3b):**

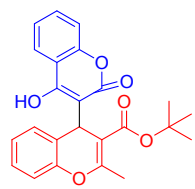

White solid; Mp 170-172° C; IR:  $\nu_{\max}$  3219, 2917, 1667, 1608, 1512, 1477, 1363, 1262, 1135, 1051, 895, 761  $\text{cm}^{-1}$ ;  $^1\text{H}$  NMR (300 MHz,  $\text{CDCl}_3$ ):  $\delta$  10.74 (s, 1H), 7.98 (d,  $J = 8.31$  Hz, 1H), 7.44-7.52 (m, 1H), 7.13-7.32 (m, 3H), 6.94-7.06 (3H, m), 5.12 (s, 1H), 2.46 (s, 3H), 1.60 (s, 9H),  $^{13}\text{C}$  NMR (75 MHz,  $\text{CDCl}_3$ ):  $\delta$  170.6, 164.0, 161.2, 160.2, 153.0, 151.3, 131.5, 127.9, 124.2, 124.1, 123.5, 121.8, 116.1, 115.4, 114.6, 109.8, 102.0, 83.3, 30.1, 28.3, 21.3;  $m/z$  (ESI); 407  $[\text{M}+\text{H}]^+$ , 429  $[\text{M}+\text{Na}]^+$ . HRMS calcd for  $\text{C}_{24}\text{H}_{22}\text{O}_6\text{Na}$ : 429.13150, found: 429.13086.

**Ethyl 6'-chloro-4-hydroxy-2'-methyl-2-oxo-2H,4'H-[3,4'-bichromene]-3'-carboxylate (3c):**

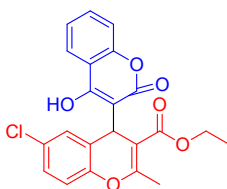

White solid; Mp 180-182° C; IR:  $\nu_{\max}$  3162, 2875, 1709, 1675, 1607, 1465, 1231, 1202, 1085, 974, 751  $\text{cm}^{-1}$ ;  $^1\text{H}$  NMR (300 MHz,  $\text{CDCl}_3$ ):  $\delta$  8.00 (d,  $J = 7.93$  Hz, 1H), 7.44-7.53 (m, 1H), 7.38 (s, 1H), 7.19-7.39 (m, 2H), 7.03-7.13 (m, 2H), 6.92 (d,  $J = 8.50$  Hz, 1H), 5.39 (s, 1H), 4.07-4.26 (m, 2H), 2.46 (s, 3H), 1.25 (t,  $J = 7.93$  Hz, 3H);  $^{13}\text{C}$  NMR (75 MHz,  $\text{CDCl}_3$ ):  $\delta$  166.6, 161.2, 160.9, 159.6, 151.8, 148.4, 130.8, 127.4, 127.1, 126.7, 123.0, 122.8, 116.1, 115.8, 115.4, 108.3, 100.6, 59.4, 30.2, 18.3, 13.3;  $m/z$  (ESI); 413  $[\text{M}+\text{H}]^+$ , 435  $[\text{M}+\text{Na}]^+$ . HRMS calcd for  $\text{C}_{22}\text{H}_{17}\text{O}_6\text{ClNa}$ : 435.06039, found: 435.06059.

**Tert-butyl 6'-chloro-4-hydroxy-2'-methyl-2-oxo-2H,4'H-[3,4'-bichromene]-3'-carboxylate (3d):**

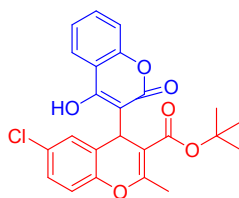

White solid; Mp 218-220° C; IR:  $\nu_{\max}$  3182, 2916, 1707, 1673, 1618, 1445, 1376, 1258, 1236, 1036, 927, 749  $\text{cm}^{-1}$ ;  $^1\text{H}$  NMR (300 MHz,  $\text{CDCl}_3$ ):  $\delta$  8.02 (d,  $J = 7.36$  Hz, 1H), 7.56 (s, 1H), 7.47-7.55 (m, 1H), 7.21-7.32 (m, 2H), 7.05-7.11 (m, 2H), 6.90 (d,  $J = 9.25$  Hz, 1H), 5.42 (s, 1H), 2.40 (s, 3H), 1.41 (s, 9H);  $^{13}\text{C}$  NMR (75 MHz,  $\text{CDCl}_3$ ):  $\delta$  164.6, 157.9, 150.8, 147.4, 130.1, 126.2, 126.1, 125.8, 123.4, 122.1, 115.4, 114.8, 114.6, 78.6, 29.4, 26.5, 17.7;  $m/z$  (ESI); 441  $[\text{M}+\text{H}]^+$ , 463  $[\text{M}+\text{Na}]^+$ .

**Methyl 6'-bromo-4-hydroxy-2'-methyl-2-oxo-2H,4'H-[3,4'-bichromene]-3'-carboxylate (3e):**

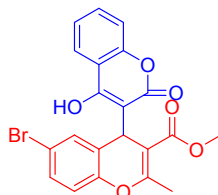

White solid; Mp 190-192° C; IR:  $\nu_{\max}$  3218, 2929, 1717, 1675, 1621, 1572, 1485, 1376, 1212, 1046, 915, 751  $\text{cm}^{-1}$ ;  $^1\text{H}$  NMR (300 MHz,  $\text{CDCl}_3$ ):  $\delta$  8.02 (d,  $J = 8.12$  Hz, 1H), 7.62 (s, 1H), 7.46-7.55 (m, 1H), 7.22-7.32 (m, 4H), 6.86 (d,  $J = 8.69$  Hz, 1H), 5.53 (s, 1H), 3.66 (s, 3H), 2.44 (s, 3H);  $^{13}\text{C}$  NMR (75 MHz,  $\text{CDCl}_3$ ):  $\delta$  167.6, 161.5, 159.1, 149.2, 131.1, 130.2, 129.9, 124.4, 123.0, 116.7, 116.0, 115.7, 115.4, 108.5, 100.6, 51.0, 30.5, 19.4  $m/z$  (ESI); 443  $[\text{M}+\text{H}]^+$ , 465  $[\text{M}+\text{Na}]^+$ .

**Ethyl 6-bromo-4-(4-hydroxy-2-oxo-2H-chromen-3-yl)-2-methylchroman-3-carboxylate (3f):**

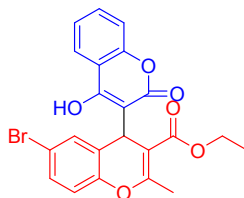

White solid; Mp 184-186° C; IR:  $\nu_{\max}$  3214, 2925, 1715, 1673, 1624, 1567, 1481, 1397, 1206, 1064, 988, 754  $\text{cm}^{-1}$ ;  $^1\text{H}$  NMR (300 MHz,  $\text{CDCl}_3$ ):  $\delta$  10.36 (br-s, 1H), 7.93 (d,  $J = 7.93$  Hz, 1H), 7.47-7.52 (m, 1H), 7.25-7.31 (m, 3H), 7.22 (d,  $J = 8.24$  Hz, 1H), 7.11 (d,  $J = 2.14$  Hz, 1H), 6.91 (d,  $J = 8.70$  Hz, 1H), 5.10 (s, 1H), 4.23-4.34 (m, 2H), 2.48 (s, 3H), 1.34 (t,  $J = 7.17$  Hz, 3H);  $^{13}\text{C}$  NMR (75 MHz,  $\text{CDCl}_3$ ):  $\delta$  171.0, 164.5, 161.1, 160.4, 152.9, 150.4, 131.8, 130.9, 130.5, 124.2, 123.8, 123.7, 117.2, 116.6, 116.5, 116.2, 109.2, 100.6, 62.2, 31.9, 21.0, 14.2  $m/z$  (ESI); 457  $[\text{M}+\text{H}]^+$ , 479  $[\text{M}+\text{Na}]^+$ . HRMS calcd for  $\text{C}_{24}\text{H}_{16}\text{O}_6\text{BrNa}$ : 479.01056, found: 479.01248.

**Tert-butyl 6'-bromo-4-hydroxy-2'-methyl-2-oxo-2H,4'H-[3,4'-bichromene]-3'-carboxylate (3g):**

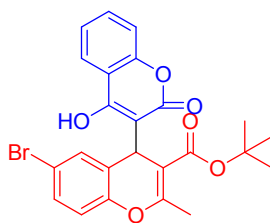

White solid; Mp 218-220° C; IR:  $\nu_{\max}$  3209, 2917, 1707, 1636, 1566, 1465, 1376, 1213, 1058, 955, 756  $\text{cm}^{-1}$ ;  $^1\text{H}$  NMR (300 MHz,  $\text{CDCl}_3$ ):  $\delta$  8.07 (s, 1H), 8.03 (d,  $J = 7.74$  Hz, 1H), 7.51-7.59 (m, 1H), 7.22-7.34 (m, 3H), 7.20 (d,  $J = 2.27$  Hz, 1H), 6.88 (d,  $J = 8.50$  Hz, 1H), 5.48 (s, 1H), 2.34 (s, 3H), 1.33 (s, 9H);  $^{13}\text{C}$  NMR (75 MHz,  $\text{CDCl}_3$ ):  $\delta$  169.9, 163.9, 157.1, 150.4, 147.4, 135.6, 129.9, 128.6, 128.4, 123.6, 121.8, 115.6, 114.4, 113.3, 101.2, 78.0, 28.8, 26.0, 17.2;  $m/z$  (ESI); 485  $[\text{M}+\text{H}]^+$ , 507  $[\text{M}+\text{Na}]^+$ . HRMS calcd for  $\text{C}_{24}\text{H}_{21}\text{O}_6\text{BrNa}$ : 507.04295, found: 507.04135.

**Methyl 4-hydroxy-2'-methyl-6'-nitro-2-oxo-2H,4'H-[3,4'-bichromene]-3'-carboxylate (3h):**

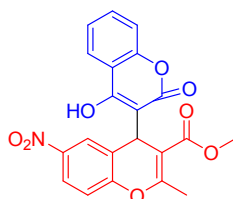

White solid; Mp 178-180° C; IR:  $\nu_{\max}$  3208, 2926, 1703, 1672, 1623, 1524, 1339, 1242, 1206, 1065, 988, 759  $\text{cm}^{-1}$ ;  $^1\text{H}$  NMR (300 MHz,  $\text{CDCl}_3$ ):  $\delta$  7.99-8.09 (m, 3H), 7.65 (br-s, 1H), 7.48-7.56 (m, 1H), 7.26-7.33 (m, 1H), 7.22 (d,  $J = 8.12$  Hz, 1H), 7.10 (d,  $J = 9.44$  Hz, 1H), 5.66 (s, 1H), 3.68 (s, 3H), 2.47 (s, 3H);  $^{13}\text{C}$  NMR (75 MHz,  $\text{CDCl}_3$ ):  $\delta$  165.8, 159.5, 153.9, 151.4, 143.3, 130.6, 123.1, 122.9, 122.5, 122.3, 115.2, 115.1, 115.0, 107.2, 100.8, 50.2, 29.6, 18.2;  $m/z$  (ESI); 432  $[\text{M}+\text{Na}]^+$ .

**Ethyl 4-hydroxy-2'-methyl-6'-nitro-2-oxo-2H,4'H-[3,4'-bichromene]-3'-carboxylate (3i):**

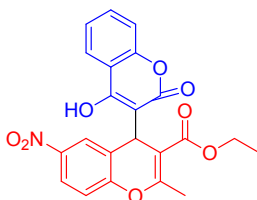

White solid; Mp 182-184° C; IR:  $\nu_{\max}$  3212, 2927, 1702, 1675, 1624, 1522, 1346, 1245, 1208, 1056, 975, 756  $\text{cm}^{-1}$ ;  $^1\text{H}$  NMR (300 MHz,  $\text{CDCl}_3$ ):  $\delta$  10.23-10.52 (br-s, 1H), 8.08 (dd,  $J_1 = 9.06$  Hz,  $J_2 = 2.64$  Hz, 1H), 8.01 (dd,  $J_1 = 7.93$  Hz,  $J_2 = 1.32$  Hz, 1H), 7.93 (d,  $J = 2.45$  Hz, 1H), 7.48-7.56 (m, 1H), 7.28-7.35 (m, 1H), 7.21 (d,  $J = 8.31$  Hz, 1H), 7.14 (d,  $J = 8.88$  Hz, 1H), 5.17 (s, 1H), 4.25-4.39 (m, 2H), 2.53 (s, 2H), 1.36 (t,  $J = 7.17$  Hz, 3H);  $^{13}\text{C}$  NMR (75 MHz,  $\text{CDCl}_3$ ):  $\delta$  170.6, 163.7, 161.3, 161.0, 155.7, 152.9, 143.9, 132.2, 124.4, 124.0, 122.9, 116.4, 116.2, 143.9, 132.2, 124.0, 122.9, 116.4, 116.2, 108.8, 101.5, 62.5, 31.9, 20.8, 14.1;  $m/z$  (ESI); 424  $[\text{M}+\text{H}]^+$ , 446  $[\text{M}+\text{Na}]^+$ . HRMS calcd for  $\text{C}_{22}\text{H}_{18}\text{O}_8\text{N}$ : 424.10319, found: 424.10269.

**Methyl 6',8'-dichloro-4-hydroxy-2'-methyl-2-oxo-2H,4'H-[3,4'-bichromene]-3'-carboxylate (3j):**

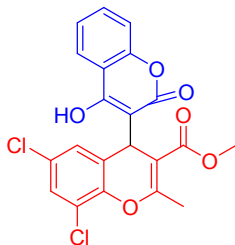

White solid; Mp 230-232° C; IR:  $\nu_{\max}$  3153, 1718, 1683, 1607, 1559, 1461, 1237, 1201, 1058, 975, 756  $\text{cm}^{-1}$ ;  $^1\text{H}$  NMR (300 MHz,  $\text{CDCl}_3$ ):  $\delta$  8.03 (d,  $J = 7.93$  Hz, 1H), 7.82 (br-s, 1H), 7.50-7.56 (m, 1H), 7.20-7.31 (m, 3H), 7.01 (d,  $J = 2.54$  Hz, 1H), 5.52 (s, 1H), 4.05-4.21 (m, 2H), 2.50 (s, 3H), 1.22 (t,  $J = 6.99$  Hz, 3H);  $^{13}\text{C}$  NMR (75 MHz,  $\text{CDCl}_3$ ):  $\delta$  165.7, 159.5, 151.3, 144.0, 130.6, 126.6, 126.5, 125.2, 124.9, 122.6, 122.4, 119.8, 115.2, 115.0, 107.3, 100.7, 50.1, 29.9, 18.1; m/z (ESI); 433  $[\text{M}+\text{H}]^+$ , 455  $[\text{M}+\text{Na}]^+$ . HRMS calcd for  $\text{C}_{21}\text{H}_{14}\text{O}_6\text{Cl}_2\text{Na}$ : 455.00601, found: 429.00596.

**Ethyl 6',8'-dichloro-4-hydroxy-2'-methyl-2-oxo-2H,4'H-[3,4'-bichromene]-3'-carboxylate (3k):**

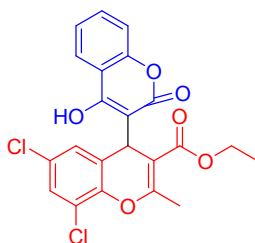

White solid; Mp 220-222° C; IR:  $\nu_{\max}$  3150, 1717, 1681, 1568, 1475, 1243, 1207, 1076, 965, 753  $\text{cm}^{-1}$ ;  $^1\text{H}$  NMR (300 MHz,  $\text{CDCl}_3$ ):  $\delta$  8.01 (d,  $J = 7.93$  Hz, 1H), 7.47-7.55 (m, 1H), 7.46 (br-s, 1H), 7.22-7.31 (m, 2H), 7.19 (d,  $J = 2.45$  Hz, 1H), 7.03 (d,  $J = 2.45$  Hz, 1H), 5.57 (s, 1H), 3.64 (s, 3H), 2.47 (s, 3H);  $^{13}\text{C}$  NMR (75 MHz,  $\text{CDCl}_3$ ):  $\delta$  166.6, 160.6, 152.1, 144.8, 131.2, 127.5, 127.3, 125.9, 125.5, 123.1, 120.6, 115.8, 108.4, 101.6, 59.9, 30.8, 18.9, 13.5; m/z (ESI); 447  $[\text{M}+\text{H}]^+$ , 469  $[\text{M}+\text{Na}]^+$ . HRMS calcd for  $\text{C}_{22}\text{H}_{16}\text{O}_6\text{Cl}_2\text{Na}$ : 469.02214, found: 469.02161.

**Tert-butyl 6',8'-dichloro-4-hydroxy-2'-methyl-2-oxo-2H,4'H-[3,4'-bichromene]-3'-carboxylate (3l):**

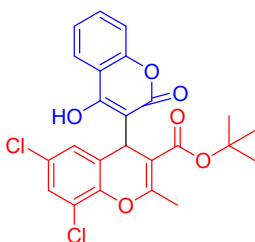

White solid; Mp 216-218° C; IR:  $\nu_{\max}$  3148, 1715, 1676, 1542, 1455, 1239, 1198, 1081, 974, 757  $\text{cm}^{-1}$ ;  $^1\text{H}$  NMR (300 MHz,  $\text{CDCl}_3$ ):  $\delta$  8.04 (d,  $J = 6.98$  Hz, 1H), 8.01 (s, 1H), 7.51-7.58 (m, 1H), 7.23-7.33 (m, 3H), 7.03 (d,  $J = 2.26$  Hz, 1H), 5.51 (s, 1H), 2.39 (s, 3H), 1.35 (s, 9H);  $^{13}\text{C}$  NMR (75 MHz,  $\text{CDCl}_3$ ):  $\delta$  164.1, 157.6, 151.0, 143.8, 130.4, 126.2, 124.9, 122.3, 119.6, 114.9, 114.8, 102.3, 79.1, 30.0, 26.6, 17.7; m/z (ESI); 475  $[\text{M}+\text{H}]^+$ , 497  $[\text{M}+\text{Na}]^+$ .

**Tert-butyl 4-hydroxy-6',8'-diiodo-2'-methyl-2-oxo-2H,4'H-[3,4'-bichromene]-3'-carboxylate (3m):**

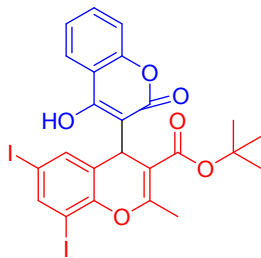

White solid; Mp 214-216° C; IR:  $\nu_{\max}$  3292, 2966, 2922, 1691, 1668, 1623, 1446, 1396, 1254, 1201, 1065, 900, 755  $\text{cm}^{-1}$ ;  $^1\text{H}$  NMR (300 MHz,  $\text{CDCl}_3$ ):  $\delta$  8.04 (d,  $J = 7.74$  Hz, 1H), 7.89-7.96 (br-s, 1H), 7.84 (d,  $J = 1.70$  Hz, 1H), 7.50-7.58 (m, 1H), 7.37 (s, 1H), 7.23-7.33 (m, 2H), 5.50 (s, 1H), 2.40 (s, 3H), 1.36 (s, 9H);  $^{13}\text{C}$  NMR (75 MHz,  $\text{CDCl}_3$ ):  $\delta$  165.3, 160.0, 151.6, 148.9, 143.4, 136.0, 130.8, 125.4, 122.8, 122.7, 115.5, 115.4, 108.2, 85.9, 84.1, 79.9, 30.6, 27.2, 18.5;  $m/z$  (ESI); 659  $[\text{M}+\text{H}]^+$ , 681  $[\text{M}+\text{Na}]^+$ . HRMS calcd for  $\text{C}_{24}\text{H}_{21}\text{O}_6\text{I}_2$ : 658.94300, found: 680.92480.

**Tert-butyl 4-hydroxy-6'-methoxy-2'-methyl-2-oxo-2H,4'H-[3,4'-bichromene]-3'-carboxylate (3n):**

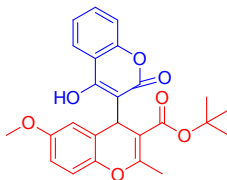

White solid; Mp 178-180° C; IR:  $\nu_{\max}$  3203, 2973, 1675, 1619, 1561, 1498, 1226, 1163, 1065, 992, 763  $\text{cm}^{-1}$ ;  $^1\text{H}$  NMR (300 MHz,  $\text{CDCl}_3$ ):  $\delta$  7.98 (dd,  $J_1 = 7.93$  Hz,  $J_2 = 1.53$  Hz, 1H), 7.46-7.50 (m, 1H), 7.27-7.30 (m, 1H), 7.21 (d,  $J = 8.39$  Hz, 1H), 6.96 (d,  $J = 9.00$  Hz, 1H), 6.92 (d,  $J = 8.50$  Hz, 1H), 6.72 (dd,  $J_1 = 9.00$  Hz,  $J_2 = 2.90$  Hz, 1H), 6.48 (d,  $J = 2.90$  Hz, 1H), 5.10 (s, 1H), 3.70 (s, 3H), 2.44 (s, 3H), 1.52 (s, 9H);  $^{13}\text{C}$  NMR (75 MHz,  $\text{CDCl}_3$ ):  $\delta$  170.7, 164.3, 161.2, 160.3, 156.1, 152.9, 145.6, 131.5, 124.1, 123.5, 122.6, 116.9, 116.2, 113.6, 112.3, 109.7, 101.2, 83.2, 55.6, 32.5, 28.3, 21.4;  $m/z$  (ESI); 459  $[\text{M}+\text{Na}]^+$ . HRMS calcd for  $\text{C}_{25}\text{H}_{24}\text{O}_7\text{Na}$ : 459.14241, found: 459.14142.

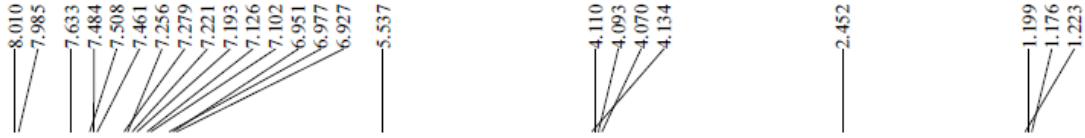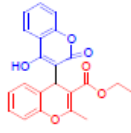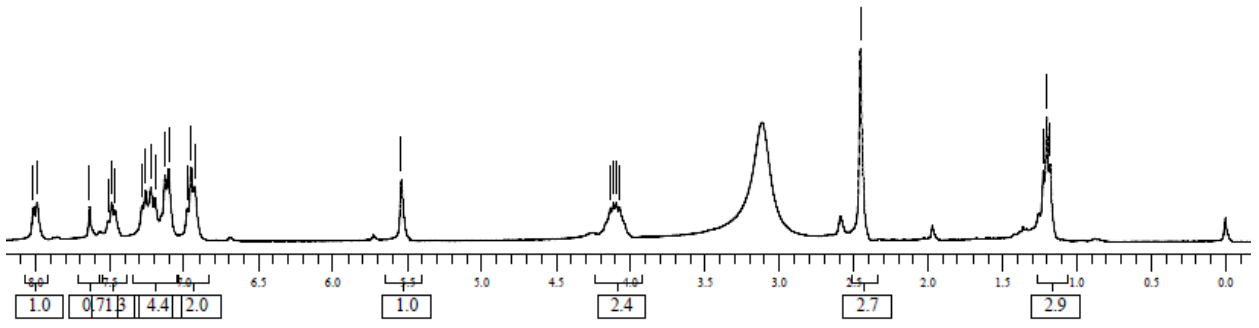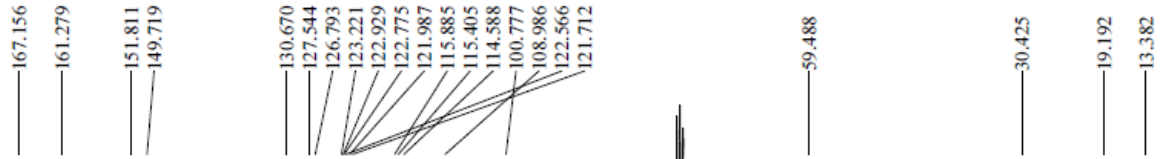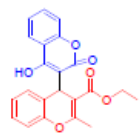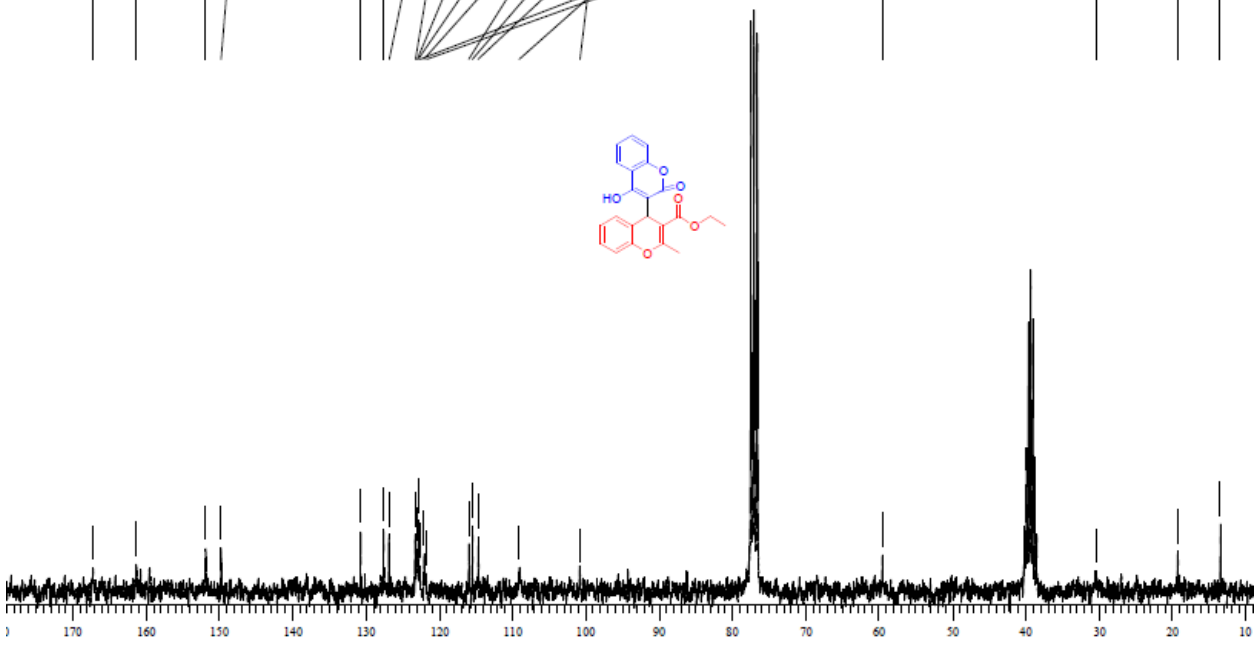



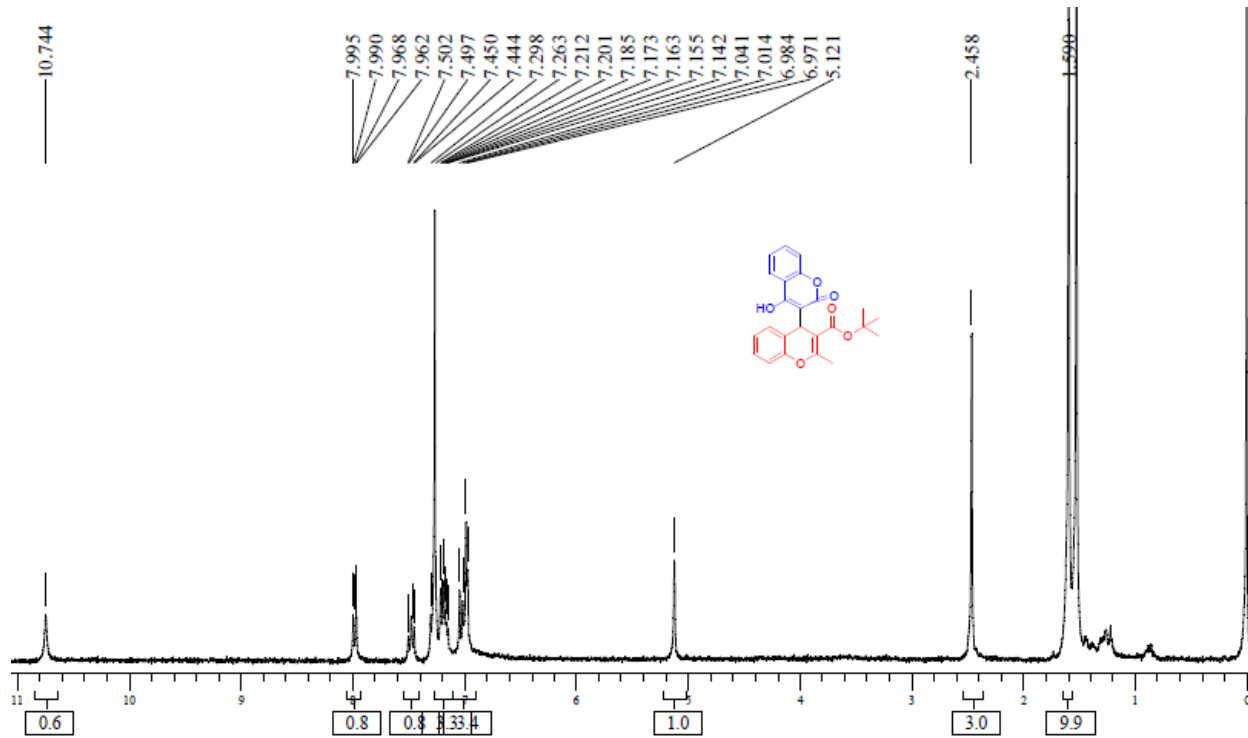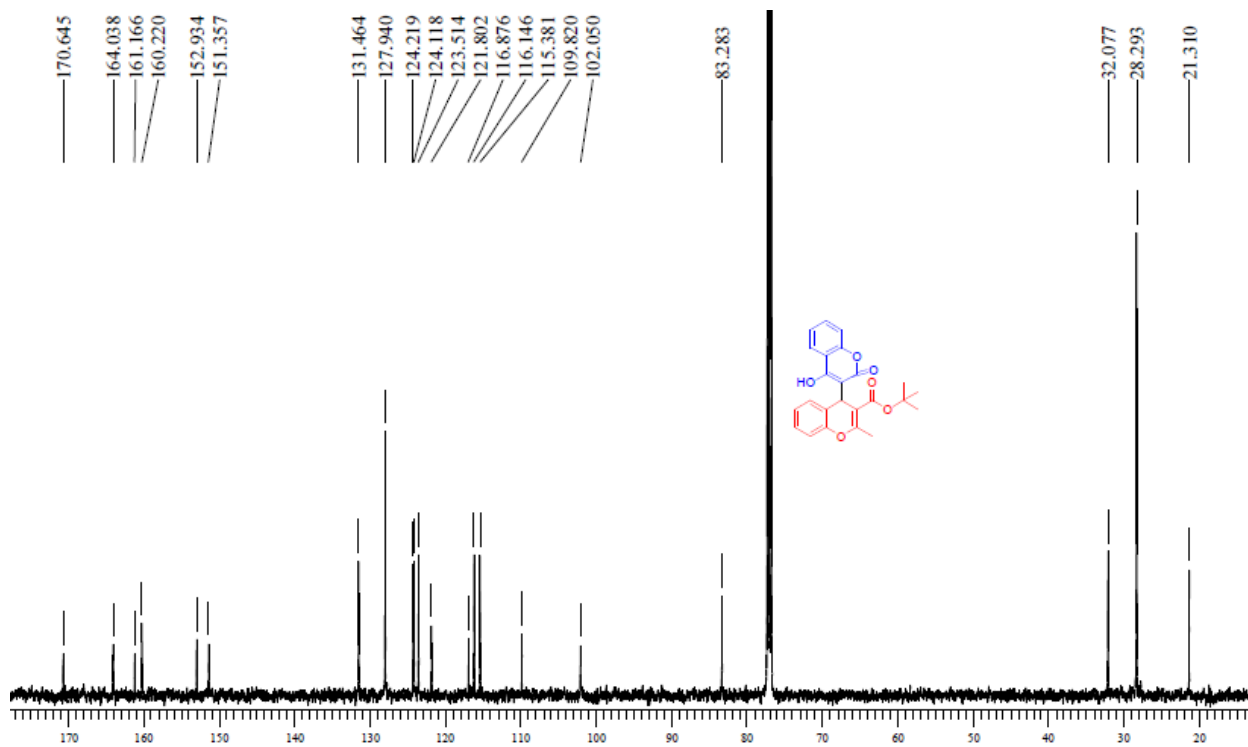

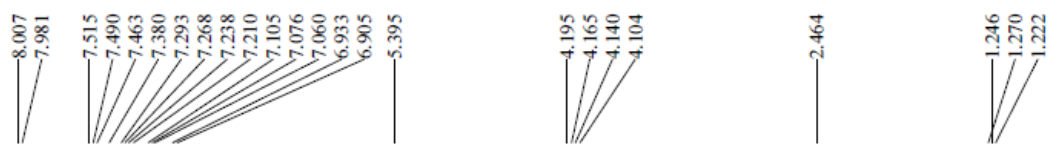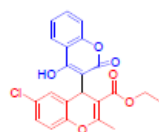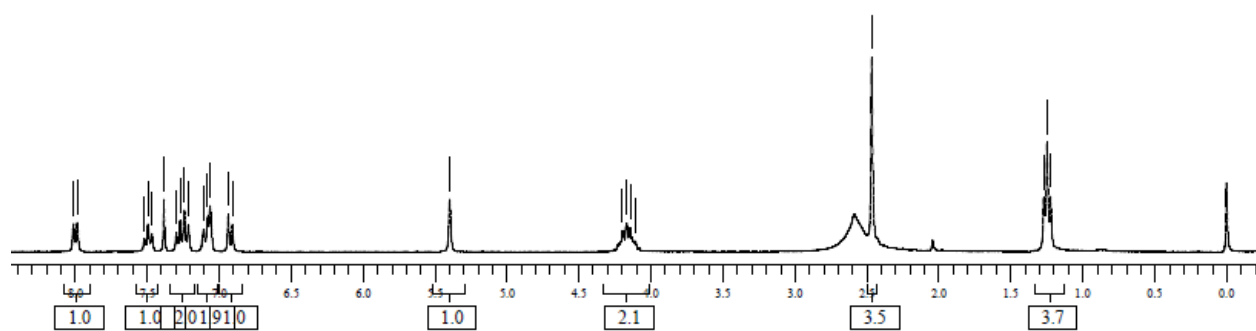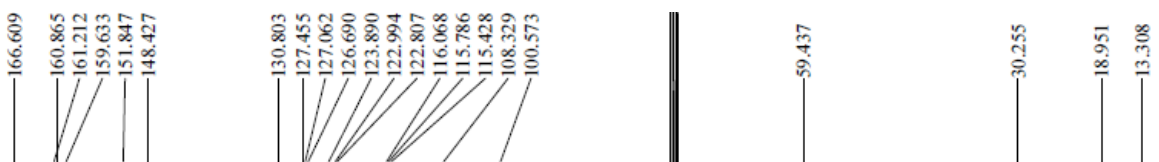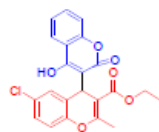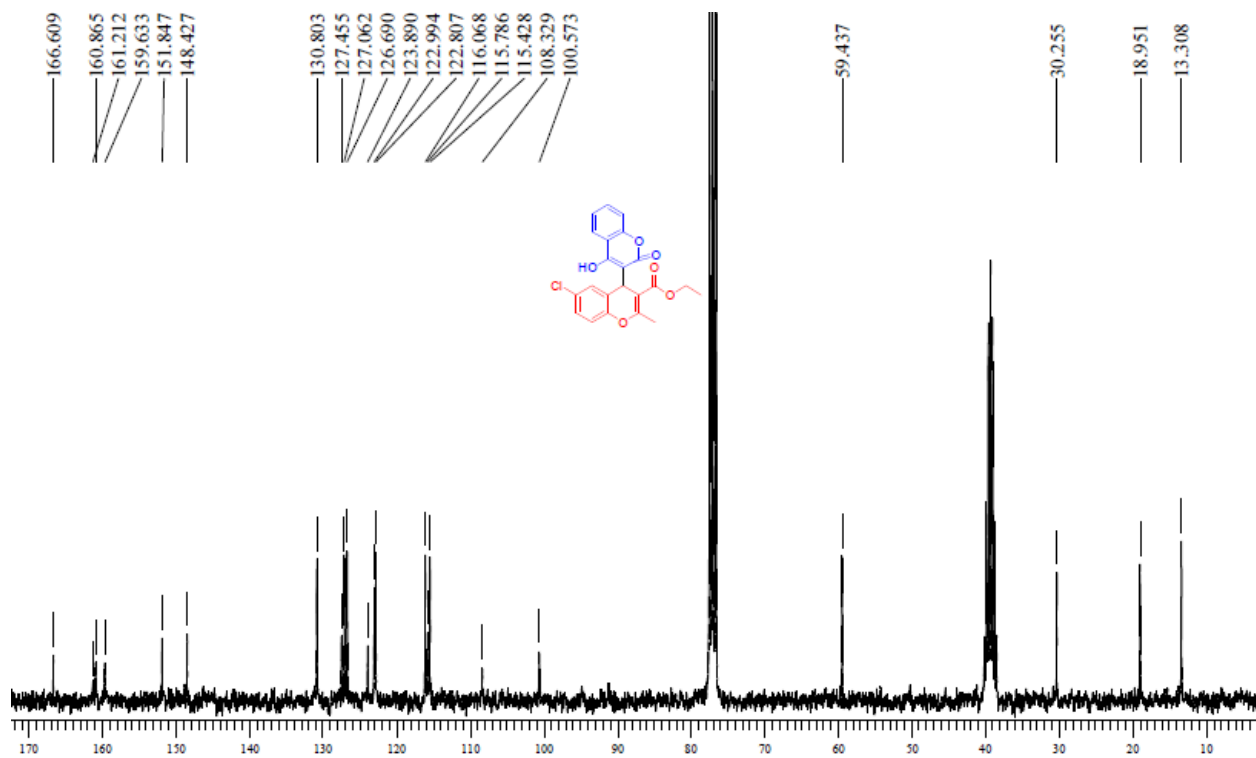

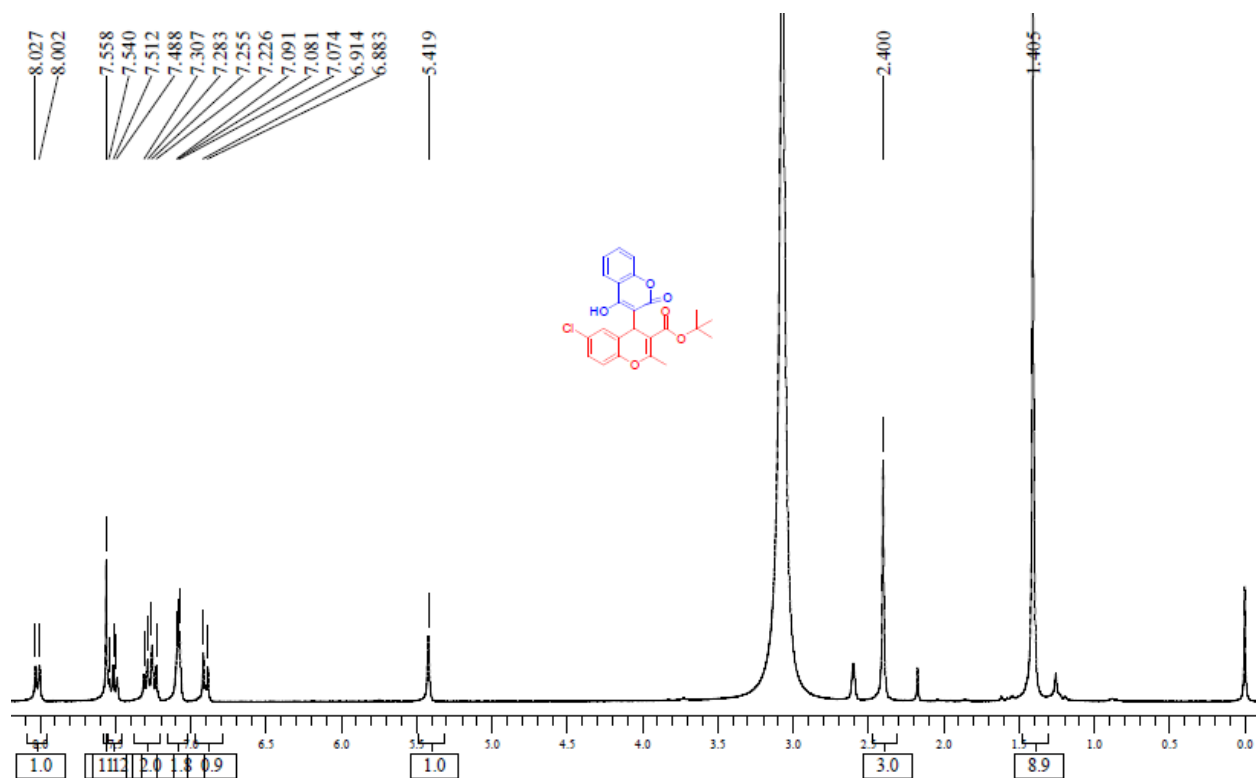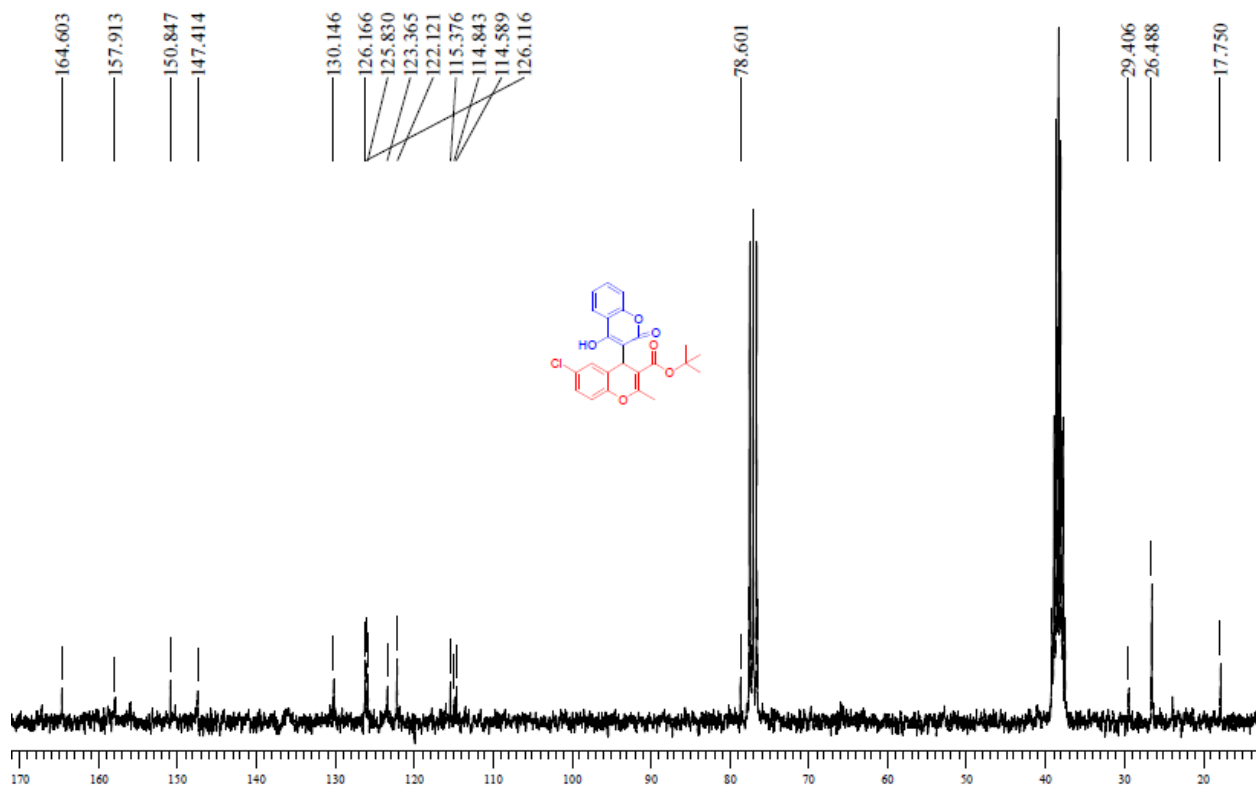

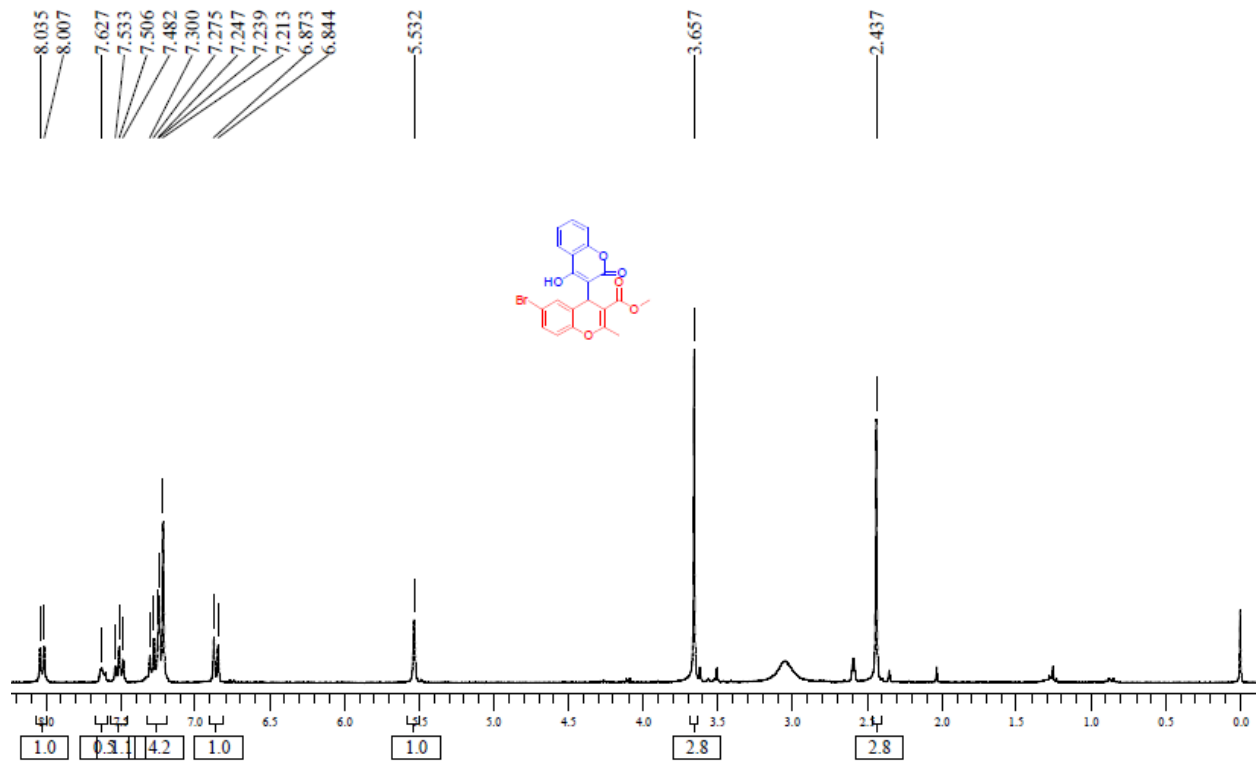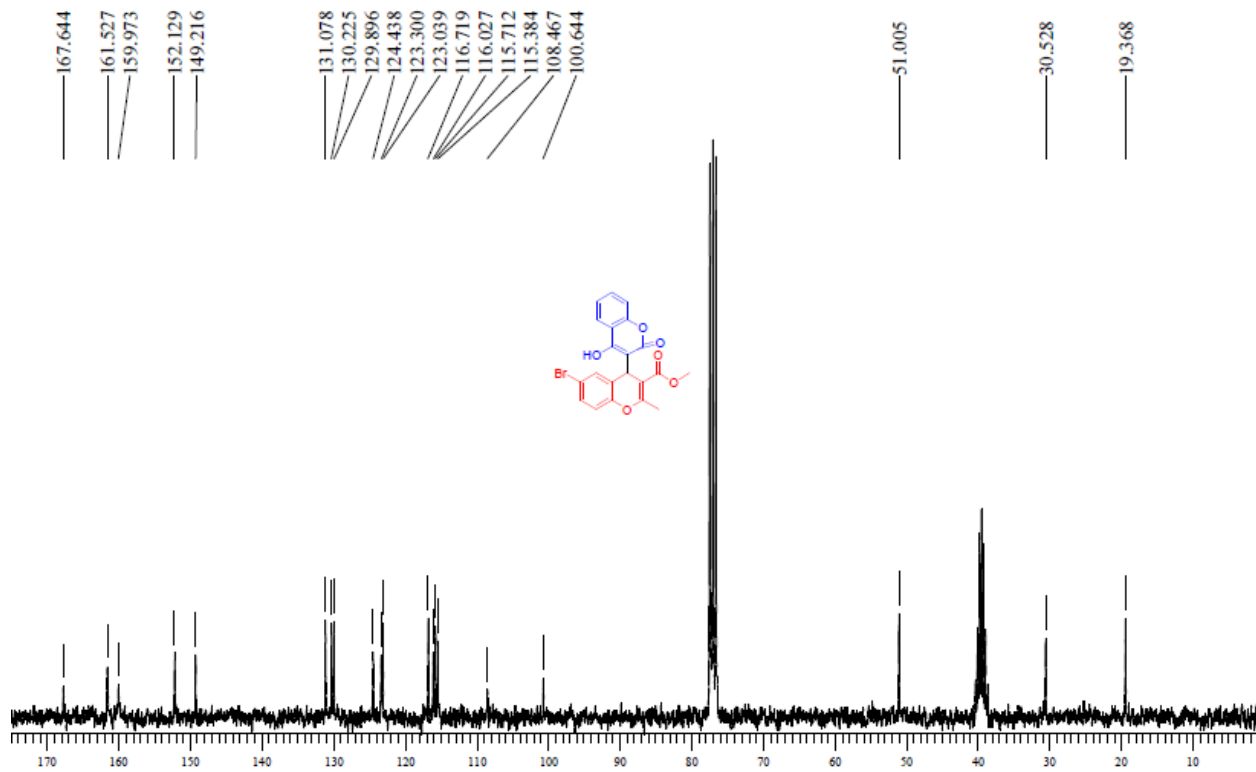

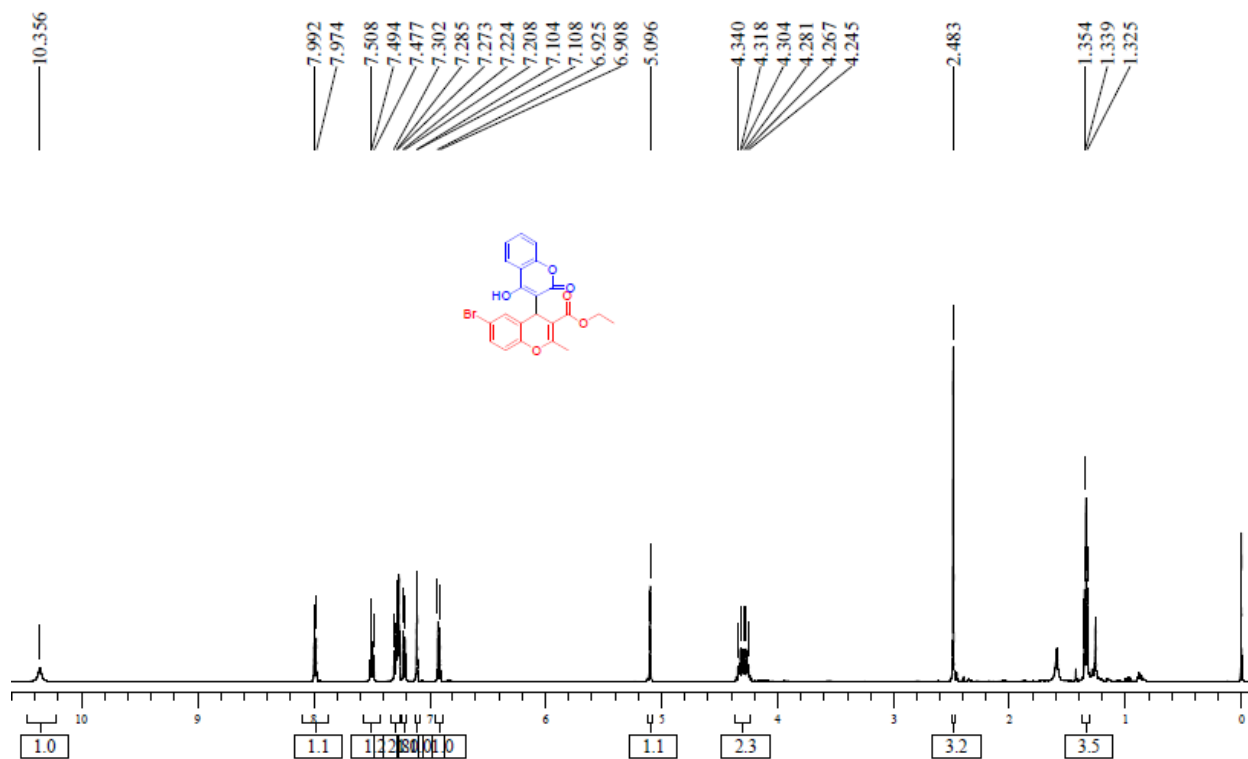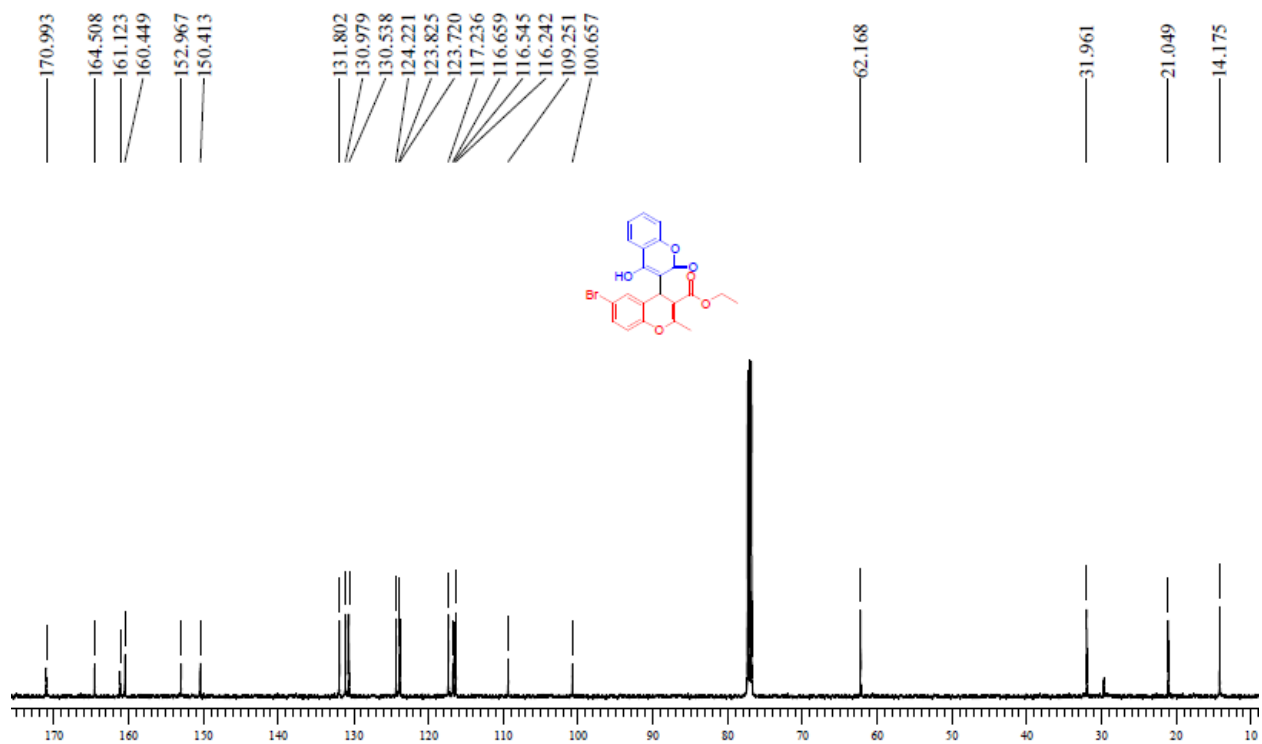

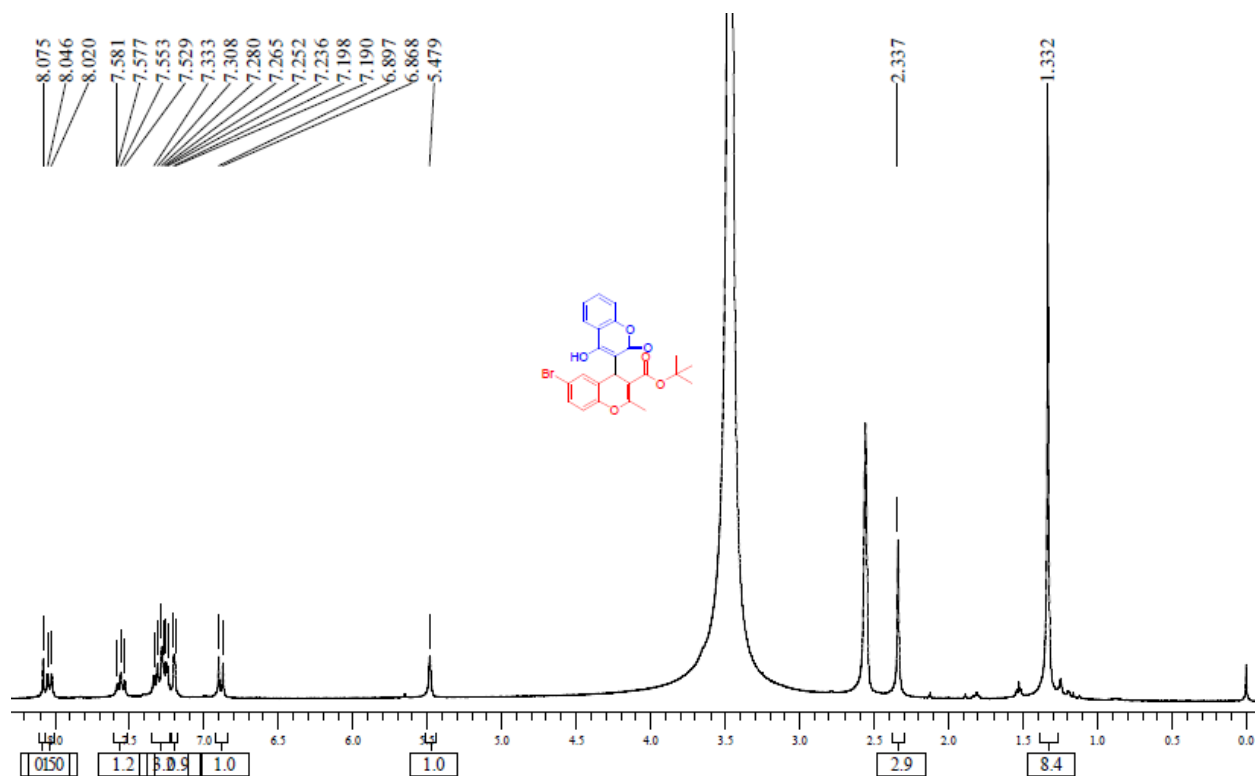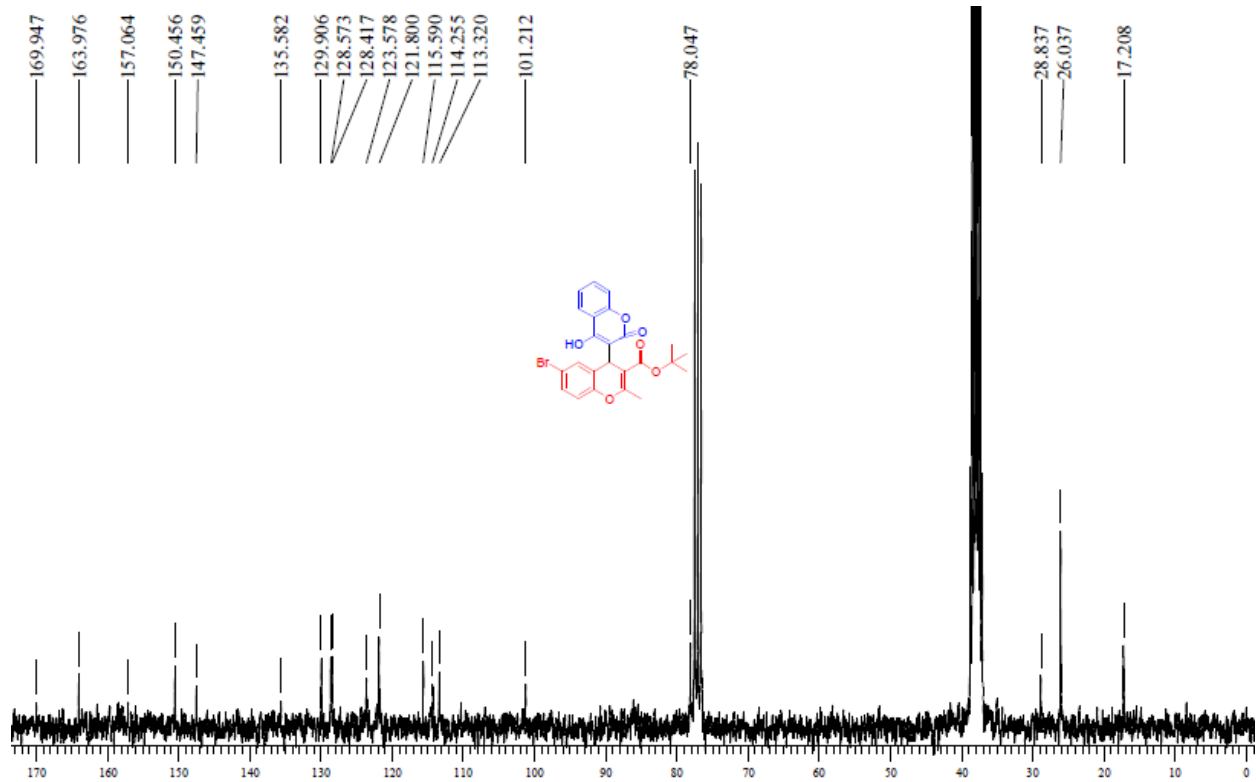

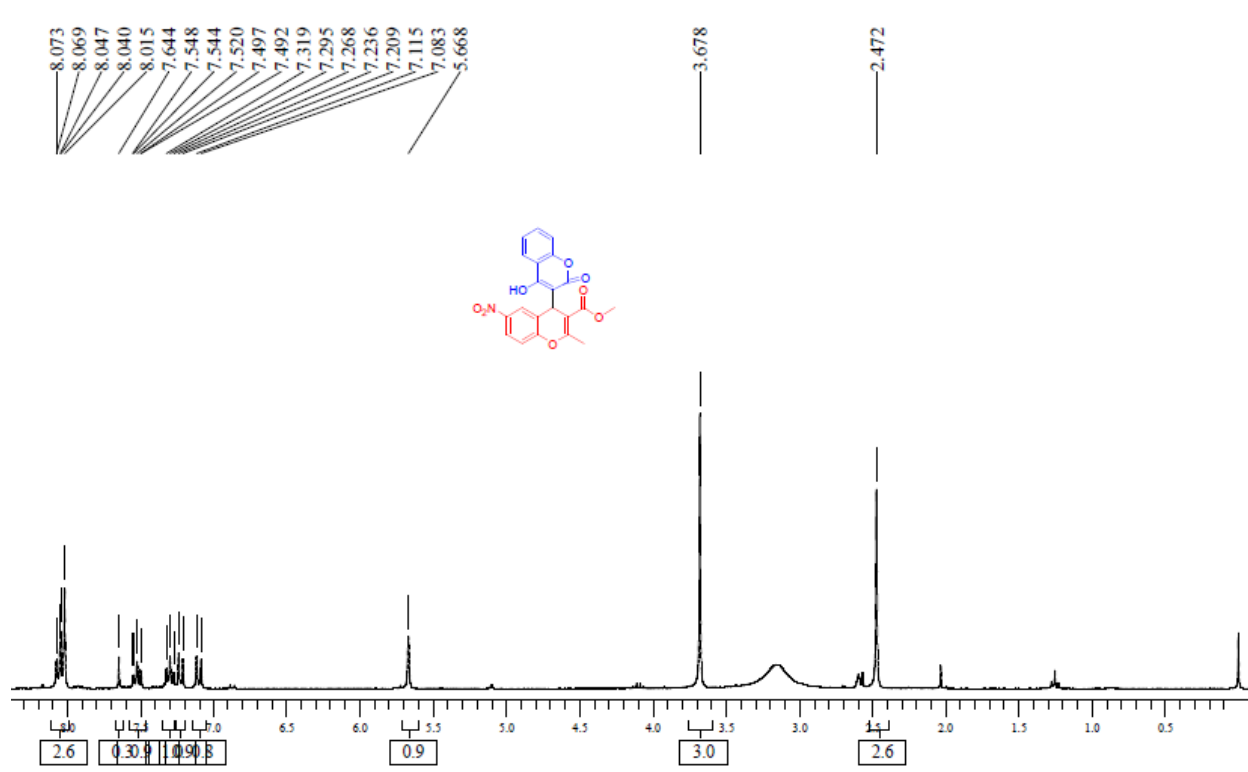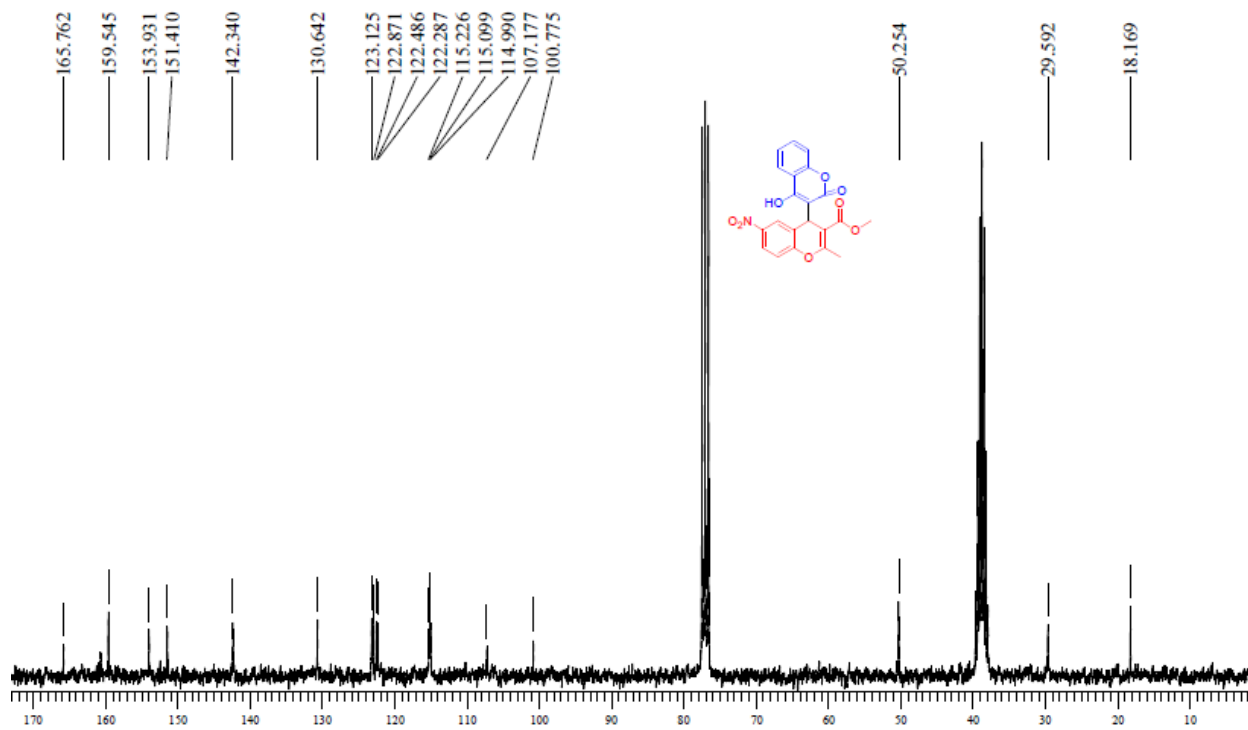

8.101  
8.092  
8.070  
8.062  
8.029  
8.024  
8.003  
7.998  
7.934  
7.926  
7.544  
7.539  
7.516  
7.492  
7.487  
7.339  
7.312  
7.288  
7.265  
7.227  
7.199  
7.153  
7.124  
5.174  
4.386  
4.375  
4.363  
4.351  
4.343  
4.327  
4.319  
4.303  
4.295  
4.283  
4.271  
4.259  
2.527  
1.357  
1.381  
1.333

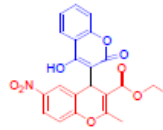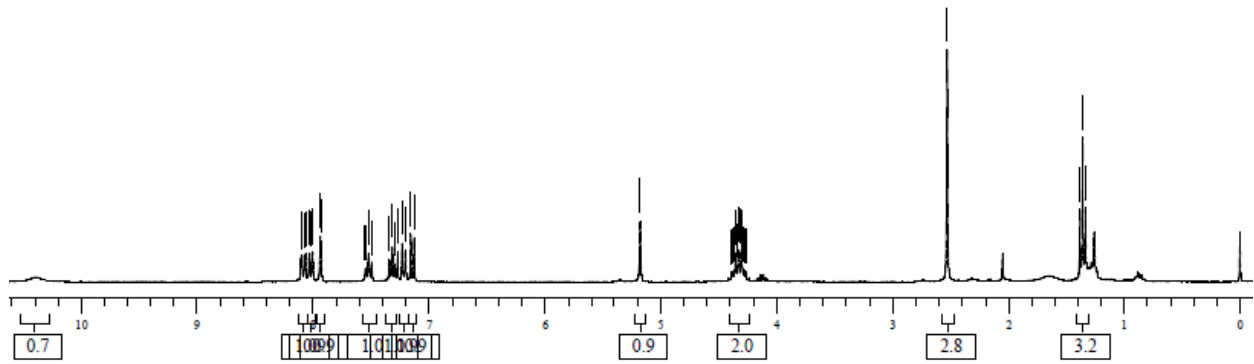

170.616  
163.742  
161.308  
161.003  
152.932  
143.960  
132.171  
124.365  
124.016  
122.974  
116.455  
116.237  
108.795  
101.353  
62.551  
31.955  
20.832  
14.126

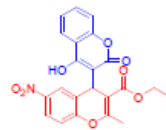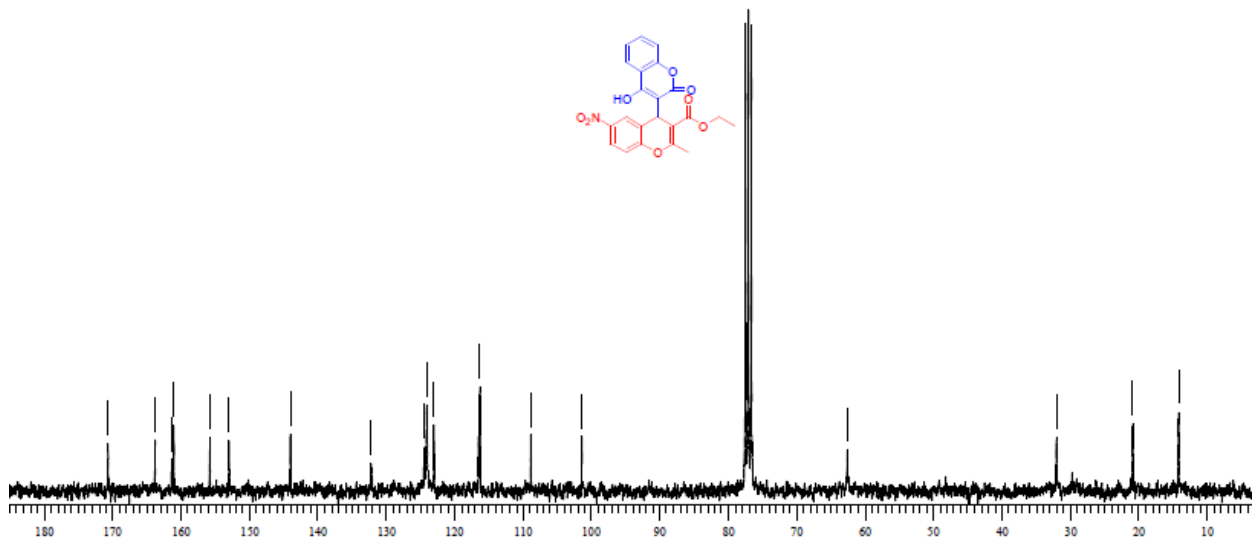



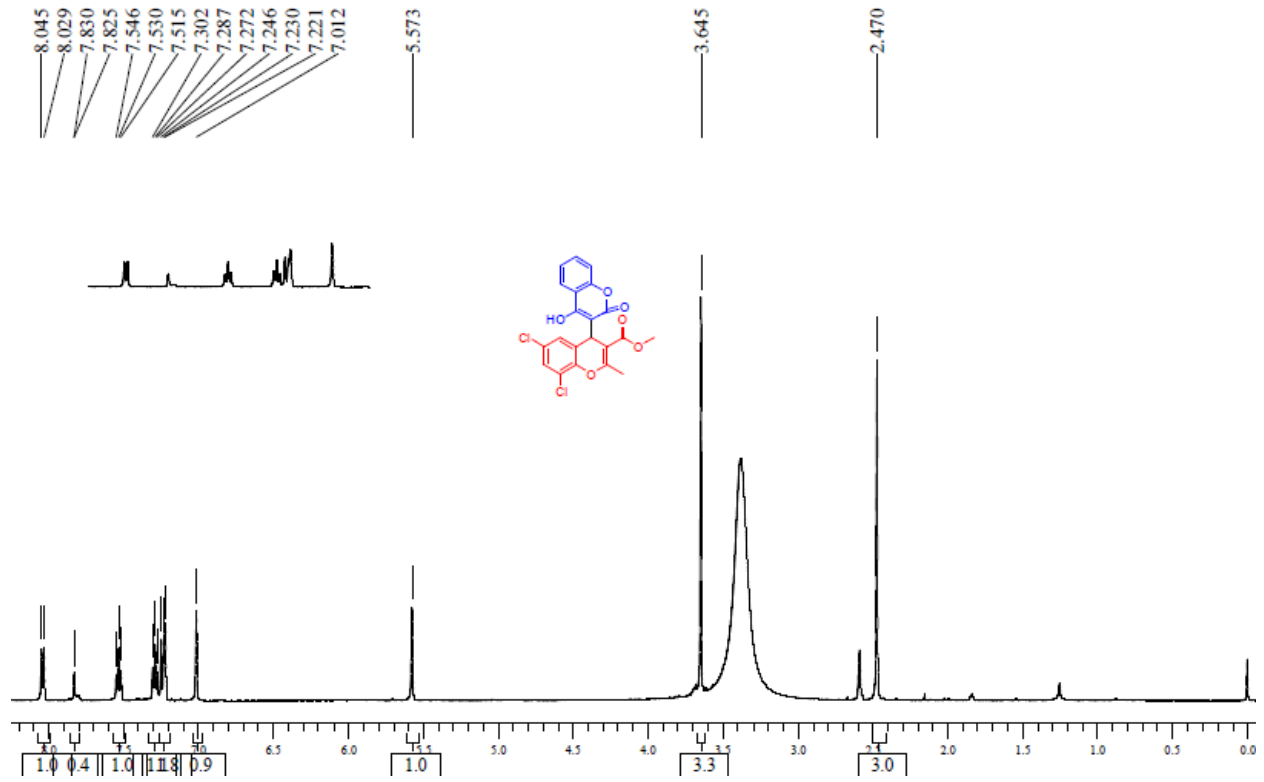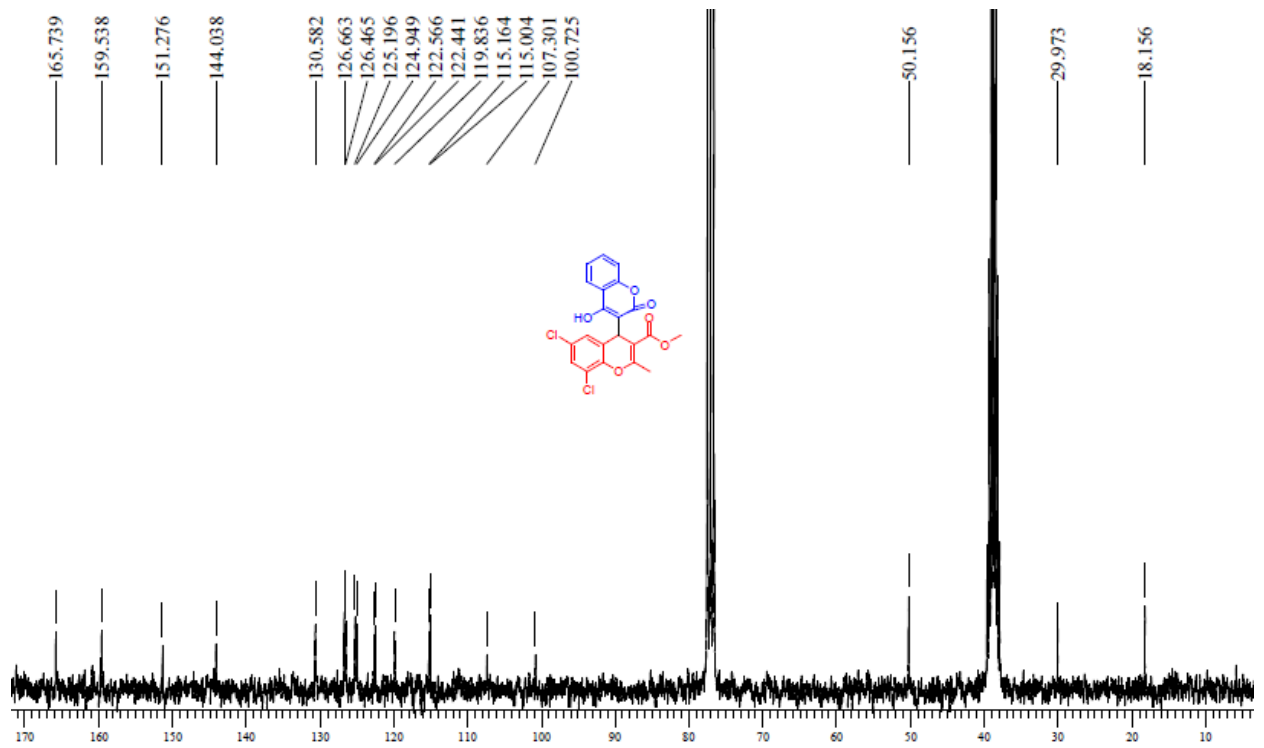

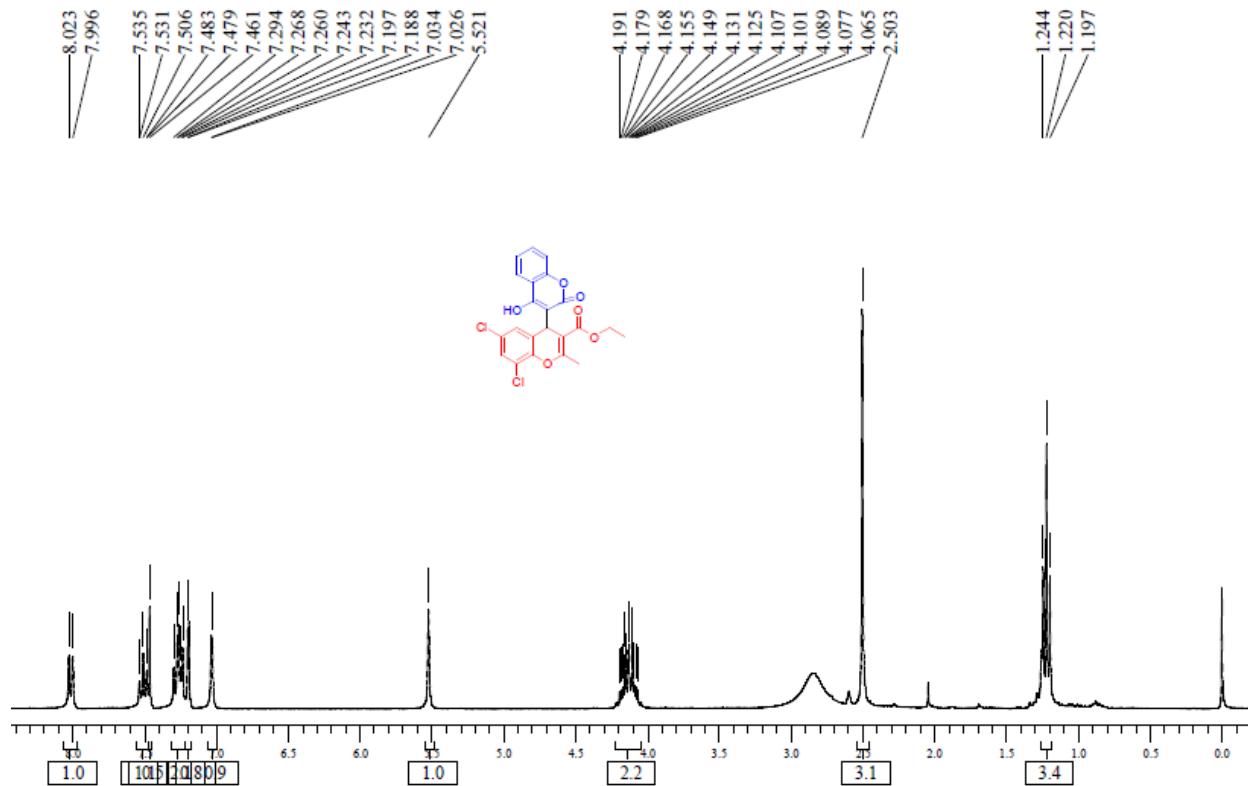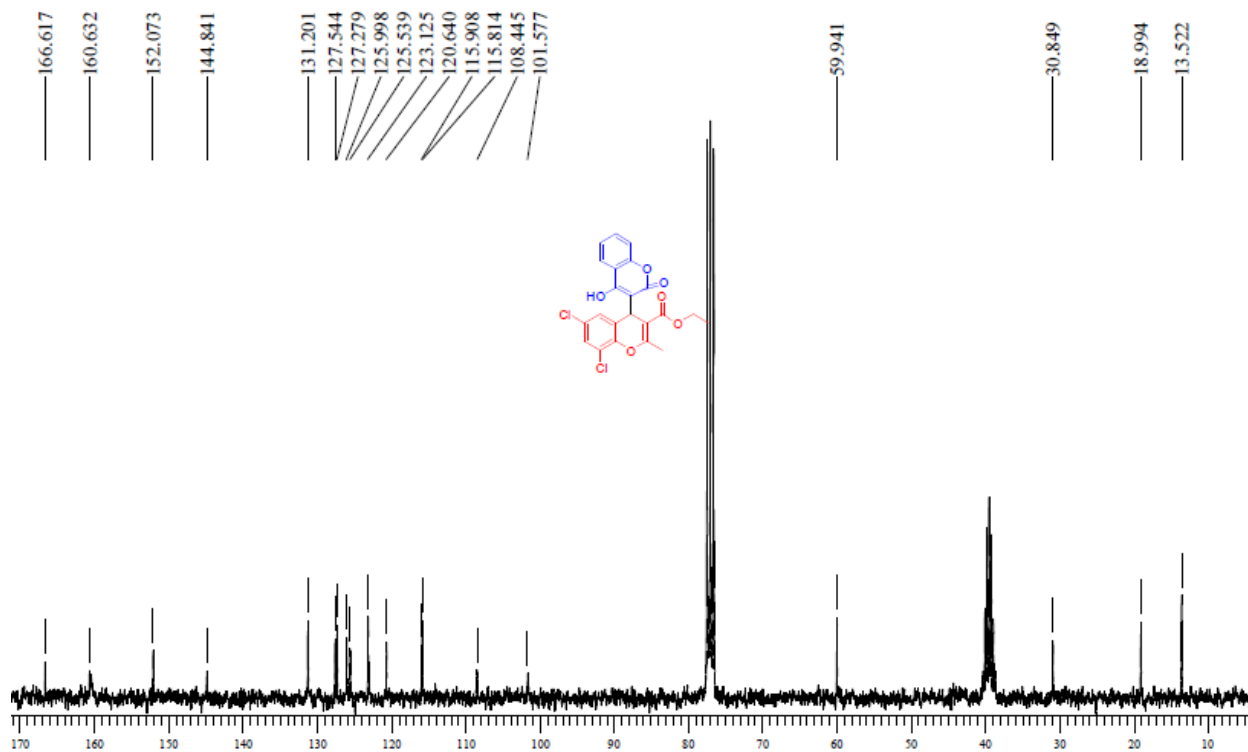

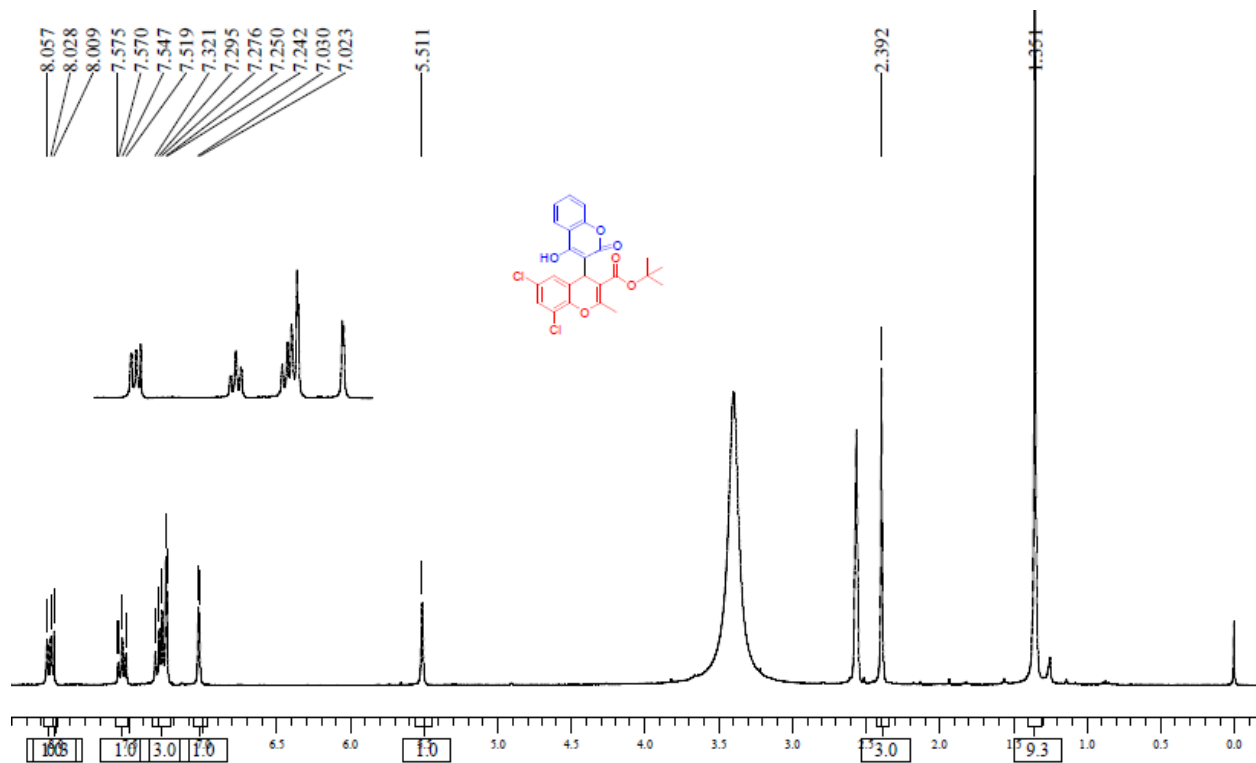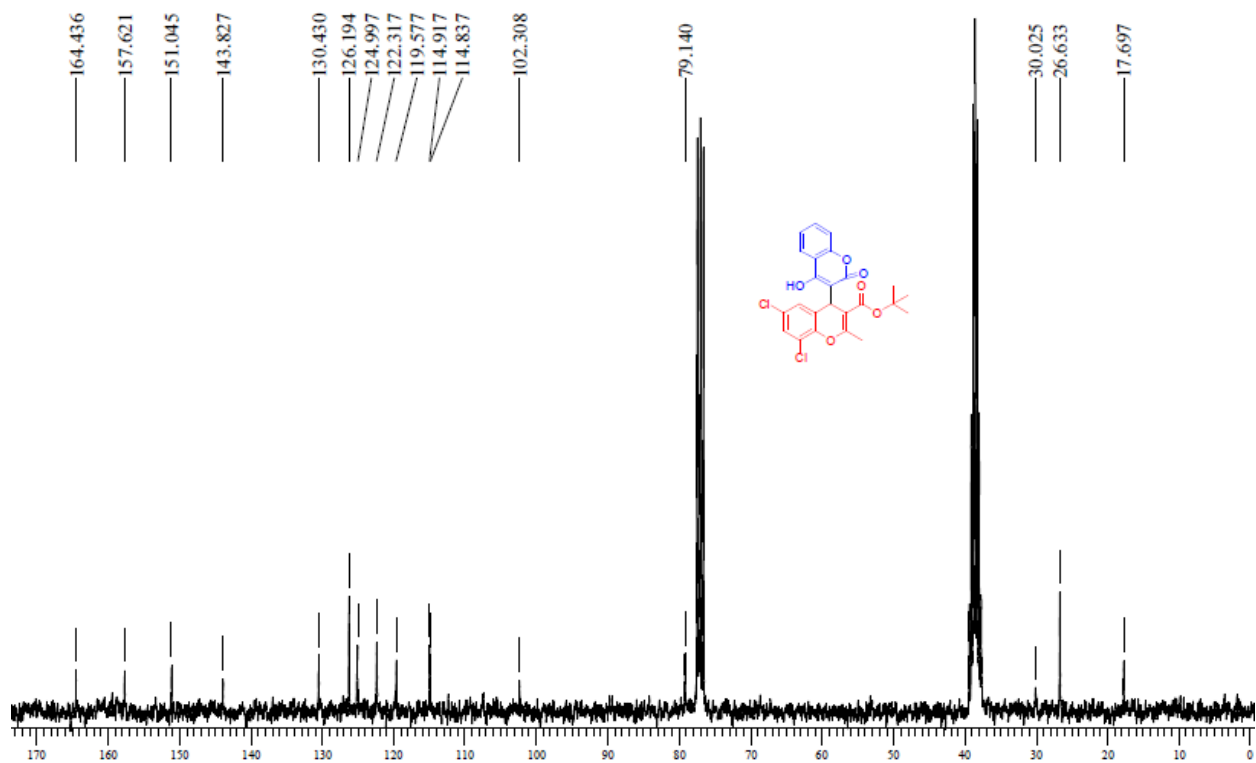

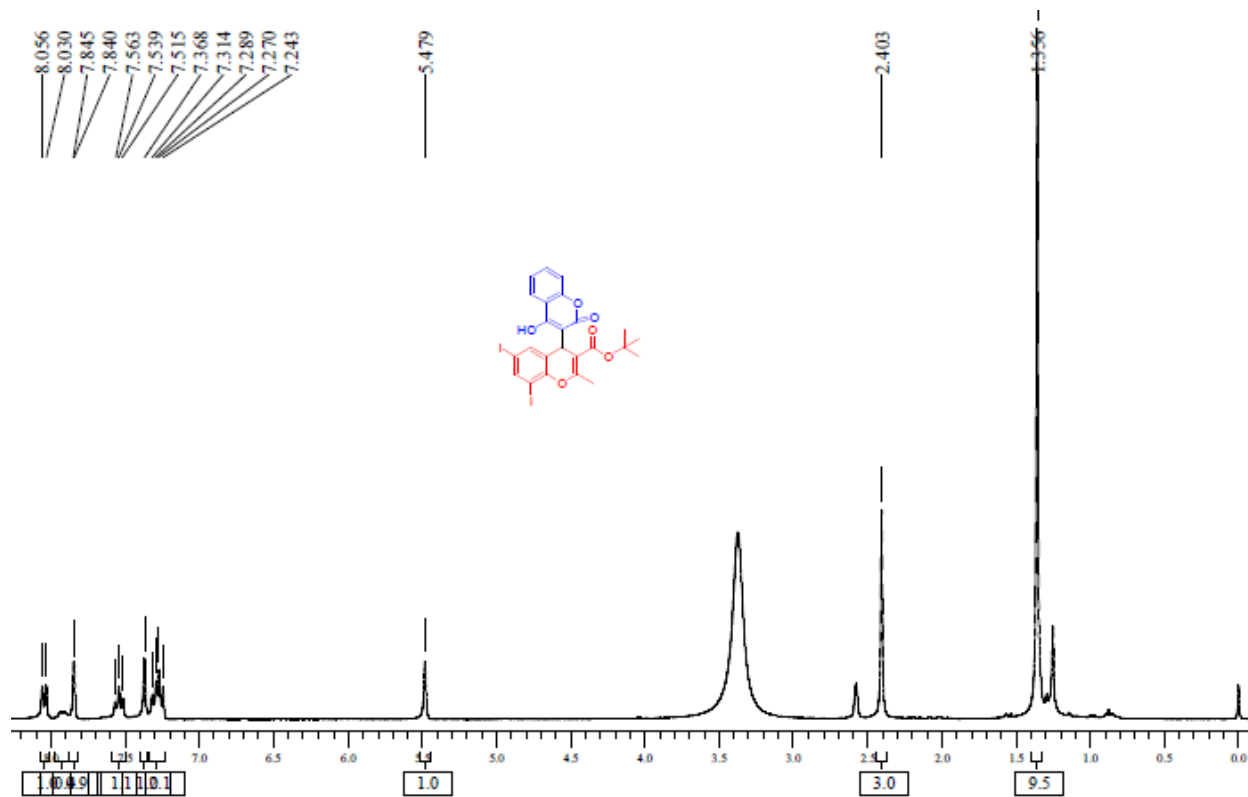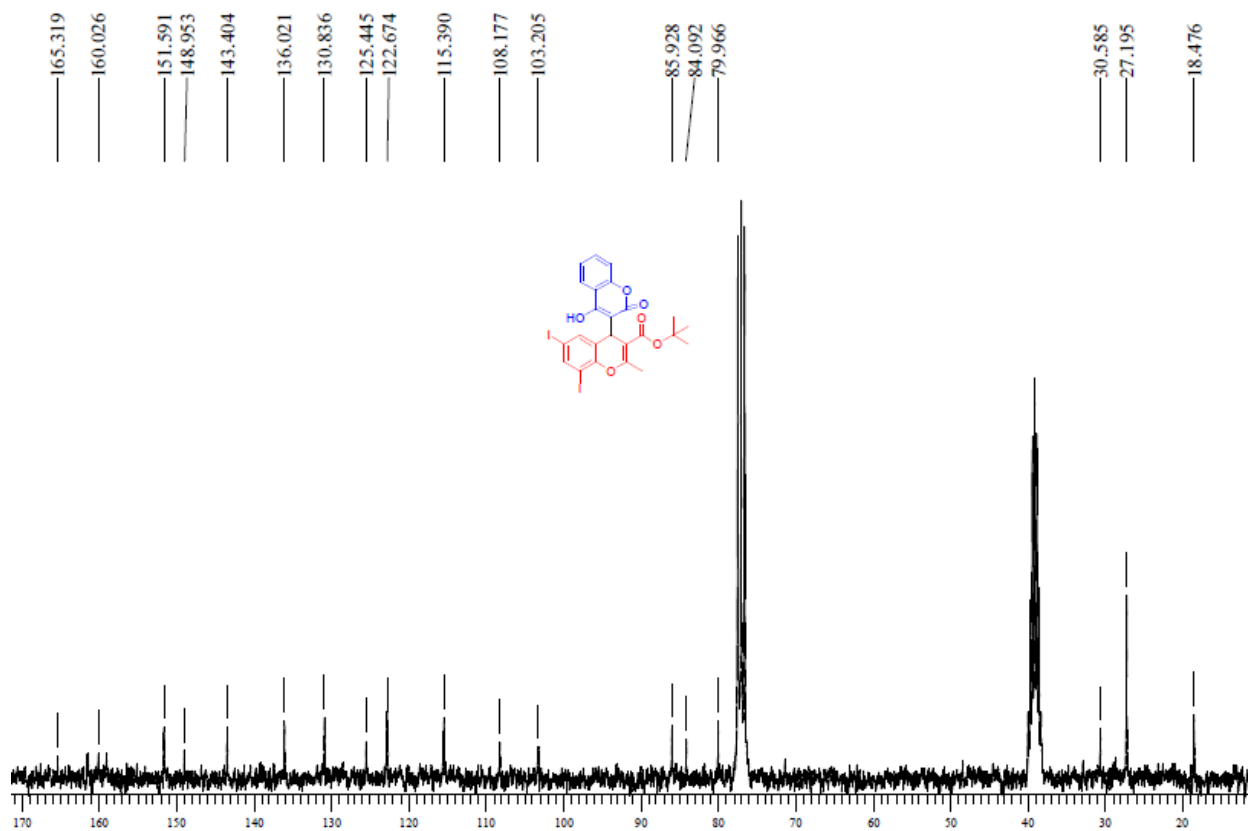

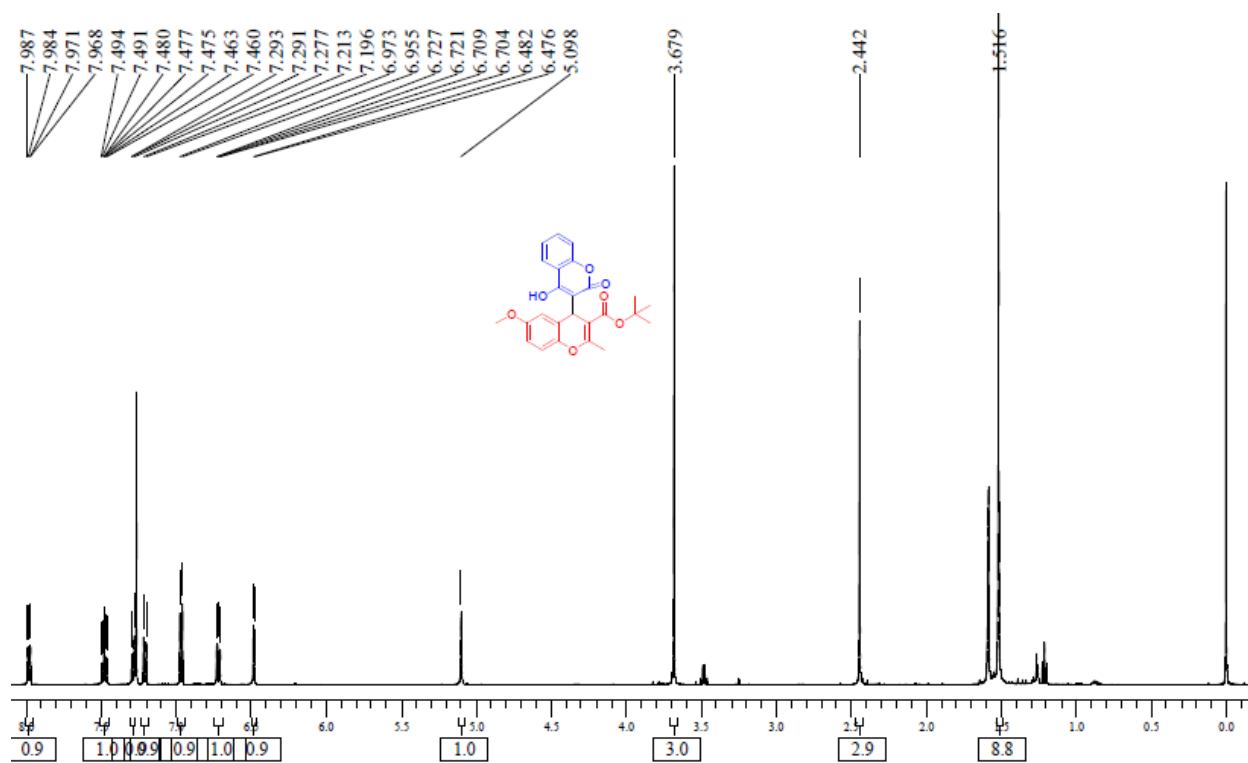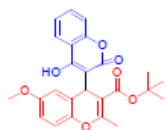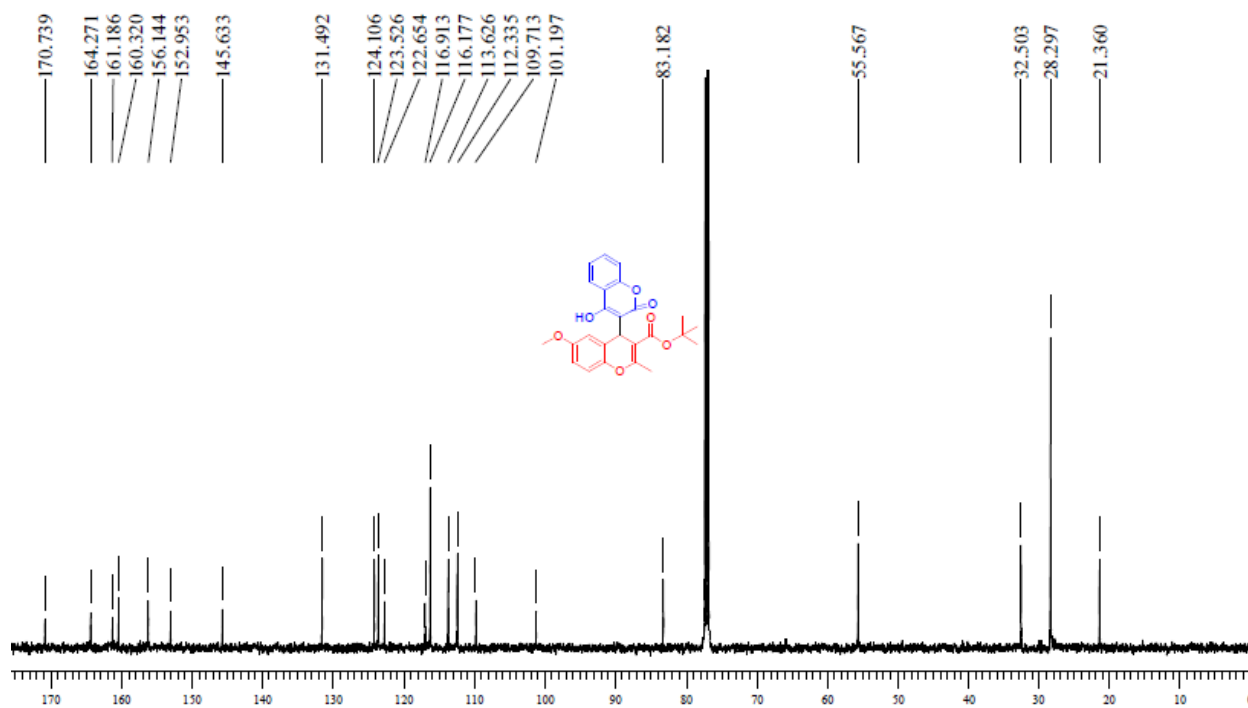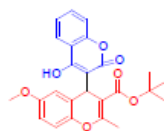

Supplement: c5ra01301a1.pdf [file c5ra01301a1.pdf]
